# Supplementary material
Source: Springer Nature journal article supplement (https://www.springermedizin.de/resource/supplementary/13054_2012_1690_MOESM1_ESM.pdf/9711294)
Supplement: MOESM1 [file 9711294]

Admissions = 2,433

Satisfied inclusion criteria = 656

Excluded = 390 (history of sleep disorder = 70; neurological impairment = 61; infectious = 117; other = 142)

Eligible = 266

Eligible not enrolled = 209 (declined = 74; discharged before = 135<sup>a</sup>)

Enrolled = 57

24 hour sleep monitoring discontinued or data not analysed = 4 (Palliation/died = 1  
Wished to discontinue PSG = 2  
Unable to analyse data = 1)

24-hour sleep monitoring completed and analysed in ICU = 53

Died = 3  
Lost to follow up = 3

Patients followed up in hospital ward = 47
